# Supplementary material
Source: PubMed Central journal article supplement (PMC5860509)
Supplement: kwx202_downeswebmaterialfinal.pdf [file kwx202_downeswebmaterialfinal.pdf]

## Web Materials

**Web Table 1.** Gestational age bias-corrected risk estimates for neonatal outcomes in the preterm birth-to-outcome pathway (n=26,123) <sup>a</sup>

| Neonatal outcome                     | Adjusted RR | $\pi_{11}=0.05, \pi_{01}=0.50$ |     |      | $\pi_{11}=0.10, \pi_{01}=0.75$ |      |      | $\pi_{11}=0.15, \pi_{01}=0.80$ |     |      |
|--------------------------------------|-------------|--------------------------------|-----|------|--------------------------------|------|------|--------------------------------|-----|------|
|                                      |             | Odds of Preterm Birth          |     |      | Odds of Preterm Birth          |      |      | Odds of Preterm Birth          |     |      |
|                                      |             | 2.0                            | 5.0 | 10.0 | 2.0                            | 5.0  | 10.0 | 2.0                            | 5.0 | 10.0 |
| Composite Perinatal-Neonatal Outcome | 1.3         | 1.9                            | 3.3 | 4.9  | 2.1                            | 3.7  | 5.3  | 2.0                            | 3.4 | 4.5  |
| Newborn Resuscitation                | 1.3         | 1.9                            | 3.3 | 4.9  | 2.1                            | 3.7  | 5.3  | 2.0                            | 3.4 | 4.5  |
| NICU Admission                       | 1.5         | 2.1                            | 3.8 | 5.7  | 2.4                            | 4.3  | 6.1  | 2.3                            | 3.9 | 5.2  |
| NICU LOS                             | 1.4         | 2.0                            | 3.5 | 5.3  | 2.2                            | 4.0  | 5.7  | 2.2                            | 3.7 | 4.9  |
| Respiratory Distress Syndrome        | 2.1         | 3.0                            | 5.3 | 8.0  | 3.3                            | 6.0  | 8.6  | 3.3                            | 5.5 | 7.3  |
| Apnea                                | 1.9         | 2.7                            | 4.8 | 7.2  | 3.0                            | 5.4  | 7.8  | 3.0                            | 5.0 | 6.6  |
| Asphyxia                             | 3.7         | 5.3                            | 9.3 | 14.0 | 5.9                            | 10.6 | 15.1 | 5.8                            | 9.7 | 12.9 |
| Antepartum or Intrapartum Stillbirth | 1.7         | 2.4                            | 4.3 | 6.4  | 2.7                            | 4.9  | 6.9  | 2.7                            | 4.5 | 5.9  |
| Neonatal Mortality $\leq 28$ days    | 2.4         | 3.4                            | 6.0 | 9.1  | 3.8                            | 6.9  | 9.8  | 3.8                            | 6.3 | 8.4  |

Abbreviations: LOS, length of stay; NICU, neonatal intensive care unit; RR, relative risk

<sup>a</sup> Risk estimates are adjusted for unmeasured common causes (confounding) of preterm birth and the specified outcomes.  $\pi_{11}$ = Estimated prevalence of unmeasured causes of preterm birth in the abruption group;  $\pi_{01}$ = Estimate prevalence of unmeasured causes of preterm birth in the non-abruption group. For newborn resuscitation under “2.0” in the first column, the scenario is that 5% of the abruption group and 50% of the non-abruption group have unmeasured common causes (confounding) of preterm birth and newborn resuscitation and that these unmeasured causes result in a 2-fold increase in risk for newborn resuscitation. In this scenario, the original adjusted risk for newborn resuscitation was RR=1.3 and the bias factor yielded a corrected RR=1.9.

**Web Table 2.** Birthweight bias-corrected risk estimates for neonatal outcomes in the SGA-to-outcome pathway (n=24,752) <sup>a</sup>

| Variable                             | $\pi_{11}=0.05, \pi_{01}=0.50$ |             |      | $\pi_{11}=0.10, \pi_{01}=0.75$ |             |      | $\pi_{11}=0.15, \pi_{01}=0.80$ |             |      |      |
|--------------------------------------|--------------------------------|-------------|------|--------------------------------|-------------|------|--------------------------------|-------------|------|------|
|                                      | Adjusted RR                    | Odds of SGA |      |                                | Odds of SGA |      |                                | Odds of SGA |      |      |
|                                      |                                | 2.0         | 5.0  | 10.0                           | 2.0         | 5.0  | 10.0                           | 2.0         | 5.0  | 10.0 |
| Composite Perinatal-Neonatal Outcome | 1.6                            | 2.3         | 4.0  | 6.1                            | 2.5         | 4.6  | 6.5                            | 2.5         | 4.2  | 5.6  |
| Newborn Resuscitation                | 1.5                            | 2.1         | 3.8  | 5.7                            | 2.4         | 4.3  | 6.1                            | 2.3         | 3.9  | 5.2  |
| NICU Admission                       | 2.1                            | 3.0         | 5.3  | 8.0                            | 3.3         | 6.0  | 8.6                            | 3.3         | 5.5  | 7.3  |
| NICU LOS                             | 1.4                            | 2.0         | 3.5  | 5.3                            | 2.2         | 4.0  | 5.7                            | 2.2         | 3.7  | 4.9  |
| Respiratory Distress Syndrome        | 3.5                            | 5.0         | 8.8  | 13.3                           | 5.6         | 10.0 | 14.3                           | 5.5         | 9.2  | 12.2 |
| Apnea                                | 2.5                            | 3.6         | 6.3  | 9.5                            | 4.0         | 7.1  | 10.2                           | 3.9         | 6.6  | 8.7  |
| Asphyxia                             | ----                           | ----        | ---- | ----                           | ----        | ---- | ----                           | ----        | ---- | ---- |
| Antepartum or intrapartum stillbirth | 4.4                            | 6.3         | 11.0 | 16.7                           | 7.0         | 12.6 | 17.9                           | 6.9         | 11.6 | 15.4 |
| Neonatal Mortality $\leq 28$ days    | 4.6                            | 6.6         | 11.5 | 17.4                           | 7.3         | 13.1 | 18.8                           | 7.2         | 12.1 | 16.1 |

Abbreviations: LOS, length of stay; NICU, neonatal intensive care unit; RR, relative risk

<sup>a</sup> Risk estimates are adjusted for unmeasured common causes (confounding) of low birthweight and the specified outcomes.  $\pi_{11}$ = Estimated prevalence of unmeasured causes of low birthweight in the abruption group,  $\pi_{01}$ = Estimate prevalence of unmeasured causes of low birthweight in the non-abruption group. For newborn resuscitation under “2.0” in the first column, the scenario is that 5% of the abruption group and 50% of the non-abruption group have unmeasured common causes (confounding) of low birthweight and newborn resuscitation and that these unmeasured causes result in a 2-fold increase in risk for newborn resuscitation. In this scenario, the original adjusted risk for newborn resuscitation was RR=1.5 and the bias factor yielded a corrected RR=2.1.
